# Supplementary material for: In situ growth of highly active Cu–Fe spinel materials on N-doped porous carbon spheres via an adjustable localized microenvironment
Source: Royal Society of Chemistry journal article supplement (doi:10.1039/d3nj05826c), 2024-01-01
Supplement: d3nj05826c1.pdf [file d3nj05826c1.pdf]

## Supporting Information

### In situ growth of highly active Cu-Fe spinel materials on N-doped porous carbon spheres via an adjustable localized microenvironment

Qidi Lu <sup>a</sup>, Jianrong Wang <sup>a</sup>, and Zhenlu Zhao <sup>a b \*</sup>

<sup>a</sup> *School of Material Science and Engineering, University of Jinan, Jinan 250022, Shandong, China.*

<sup>b</sup> *State Key Lab of Electroanalytical Chemistry, Changchun Institute of Applied Chemistry, Chinese Academy of Sciences, Changchun 130022, Jilin, China*

*E-mail: mse\_zhaozl@ujn.edu.cn*

## 1. Chemicals and materials

Urea ( $\text{CO}(\text{NH}_2)_2$ , 99%), potassium hydroxide (KOH, 85%), Copper chloride dihydrate ( $\text{CuCl}_2 \cdot 2\text{H}_2\text{O}$ , 99%) were purchased from HengXing Chemical Reagent (TianJin, China), Ferric chloride hexahydrate ( $\text{FeCl}_3 \cdot 6\text{H}_2\text{O}$ , 99%) was purchased from Macklin (Shanghai, China), glucose was purchased from Sinopharm Group chemical reagents (Shanghai, China). Sodium silicate solution was purchased from Sigma Aldrich (Shanghai, China), Ethylenediaminetetraacetic acid disodium salt ( $\text{EDTA-2Na}$ ,  $\text{C}_{10}\text{H}_{14}\text{N}_2\text{Na}_2\text{O}_8$ , 99.5%) was purchased from DaMao Chemical Reagent (TianJin, China). 5% Nafion were bought from DuPont. All chemicals were used without further purification. Deionized water ( $\geq 18.25 \text{ M}\Omega$ ) used in the measurements was obtained from a Millipore System (Millipore Q).

## 2. Materials characterization

A field emission scanning electron microscope (FESEM) was used to study the morphology of the sample (ZEISS Gemini300). The crystal structure was measured by the X-ray diffraction of Cu K $\alpha$  radiation (XRD,  $\lambda = 0.15418 \text{ nm}$ , Bruker, D8 ADVANCE). X-ray photoelectron spectroscopy (XPS, Thermo Fisher Scientific ESCALAB Xi+) was used to study the surface chemical composition of the catalyst.

## 3. Electrochemical characterization

The electrochemical tests were conducted using the CHI 760E electrochemical workstation and rotational equipment with a standard three-electrode system. A graphite rod and a 1M-KOH Hg/HgO electrode were employed as the counter and reference electrodes, respectively. The electrocatalyst inks were prepared by dispersing 5 mg electrocatalysts in a solution consisting of 20  $\mu\text{L}$  5% Nafion 117, 240  $\mu\text{L}$  water, and 740  $\mu\text{L}$  isopropanol. The working electrode was prepared by applying 10  $\mu\text{L}$  of the electrocatalyst onto a rotating ring-disk electrode (RRDE, diameter = 4 mm) with a loading capacity of 0.5 mg per square centimeter.

Oxygen reduction reaction (ORR) tests were conducted in a 0.1 M KOH solution saturated with  $\text{O}_2$ . All potentials were calibrated to the reversible hydrogen electrode (RHE) using the equation:

$$E (\text{vs. RHE}) = E (\text{Hg/HgO}) + 0.059 \cdot \text{pH} + 0.098$$

Linear sweep voltammetry (LSV) polarization curves were recorded at a scan rate of 5 mV per second. Long-term durability of the prepared electrocatalysts and Pt/C benchmark was assessed by performing chronoamperometry at 0.8 V and comparing LSV curves before and after thousands of cyclic voltammetry (CV) cycles. The electron transfer number ( $n$ ) was calculated utilizing the Koutecký-Levich equations.

$$\frac{1}{j} = \frac{1}{j^l} + \frac{1}{j^k} = \frac{1}{B\omega^{1/2}} + \frac{1}{j^k}$$

$$B = 0.62nFC_0D^{2/3}\nu^{-1/6}$$

The measured, diffusion-limited, and kinetic current density are denoted as  $j$ ,  $j^l$ , and  $j^k$  respectively. The electrode's angular velocity ( $\omega$ ) is expressed in radians per second ( $\text{rad s}^{-1}$ ), while the value of the Faraday constant ( $F$ ) is  $96485 \text{ C mol}^{-1}$ . The saturated  $\text{O}_2$  concentration ( $C_0$ ) is  $1.21 \times 10^{-6} \text{ mol cm}^{-3}$ , and the diffusion coefficient of  $\text{O}_2$  in  $0.1 \text{ M KOH}$  ( $D$ ) is  $1.9 \times 10^{-5} \text{ cm}^2 \text{ s}^{-1}$ . The kinetic viscosity ( $\nu$ ) is  $0.01 \text{ cm}^2 \text{ s}^{-1}$ . The RRDE measurements were conducted with a ring electrode potential of  $1.2 \text{ V}$ . The  $\text{H}_2\text{O}_2$  yield ( $\text{H}_2\text{O}_2\%$ ) and  $n$  of ORR were determined using the following equations:

$$n = \frac{4j^d}{j^d + j^r/N}$$

$$\text{H}_2\text{O}_2\% = \frac{200 j^r/N}{j^d + j^r/N}$$

where  $N$ ,  $j^d$  and  $j^r$  are the current collection efficiency of the Pt ring electrode (0.37), the disk current and the ring current, respectively.

#### 4. Oxygen reduction reaction

Glassy carbon (GCE) was coated with catalyst ink using a  $0.5 \text{ mg cm}^2$  loading quantity. The reference catalyst used was commercial Pt/C (20 wt%). The LSV curves were measured at a series of rotating electrode speeds (100, 400, 900, 1600 and 2500 rpm) at a scan rate of  $2 \text{ mV s}^{-1}$  whereas the CV curves were measured in an  $\text{O}_2$ -saturated  $0.1 \text{ M KOH}$  aqueous solution at a scan rate of  $2 \text{ mV s}^{-1}$  at a potential range of  $-0.8$  to  $0.2 \text{ V}$  (E Hg/HgO). The reversible hydrogen electrode (RHE) was created from each potential using the formula:

$$E (\text{vs. RHE}) = E (\text{Hg/HgO}) + 0.059 \cdot pH + 0.098$$

In alkaline medium, the ORR could occur in the following 4 electron reaction pathway:

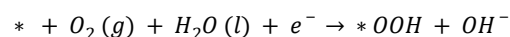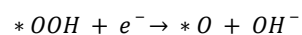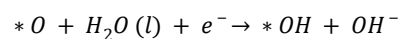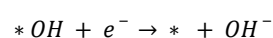

## 5. Supplementary Tables

Table S1. Comparison of ORR parameters for recent reported electrocatalysts in 0.1M KOH.

| Catalysts                                                 | E <sub>onset</sub> (V) | E <sub>1/2</sub> (V) | Reference |
|-----------------------------------------------------------|------------------------|----------------------|-----------|
| Cu-Fe N-CS                                                | 0.90 V                 | 0.83 V               | This Work |
| N-CS                                                      | 0.87 V                 | 0.74 V               | This Work |
| Cu-Fe ACS                                                 | 0.67 V                 | 0.59 V               | This Work |
| Cu-Fe CS                                                  | 0.8 V                  | 0.74 V               | This Work |
| C-Cu <sub>0.7</sub> Fe <sub>2.3</sub> O <sub>4</sub>      | 0.72 V                 | 0.65 V               | 1         |
| C-MnFe <sub>2</sub> O <sub>4</sub> NPs                    | 0.86 V                 | 0.81 V               | 1         |
| C-Co <sub>0.8</sub> Fe <sub>2.2</sub> O <sub>4</sub>      | 0.79 V                 | 0.72 V               | 1         |
| CuCo <sub>2</sub> O <sub>4</sub>                          | 0.89 V                 | 0.72 V               | 2         |
| FeCo <sub>2</sub> O <sub>4</sub>                          | 0.88 V                 | 0.7 V                | 2         |
| ZnCo <sub>1.4</sub> Mn <sub>0.6</sub> O <sub>4</sub>      | 0.88 V                 | 0.8 V                | 3         |
| NiMn <sub>2</sub> O <sub>4</sub>                          | 0.81 V                 | 0.6 V                | 4         |
| Ce-CMO-18%/MWCNTs                                         | 0.93 V                 | 0.84 V               | 5         |
| CoMn <sub>2</sub> O <sub>4</sub> (0.15 M)-400             | 0.90 V                 | 0.83 V               | 6         |
| HEO/CoNC-3-1                                              | 0.92 V                 | 0.85 V               | 7         |
| NiFe <sub>1.75</sub> Co <sub>0.25</sub> O <sub>4</sub> /C | 0.74 V                 | 0.68 V               | 8         |
| m-ZCO-NB                                                  | 0.79 V                 | 0.75 V               | 9         |
| NiCo <sub>2</sub> O <sub>4</sub> -C <sub>1</sub> -HY      | 0.89 V                 | 0.72 V               | 10        |

1. H. Zhu, S. Zhang, Y.-X. Huang, L. Wu and S. Sun, *Nano Lett.*, 2013, **13**, 2947-2951.
2. S. Kang, S. Li, X. Xiao, Z. Zhang, Y. Shi, M. Zhao and Y. Wang, *Nanotechnology*, 2022, **33**, 405705-405718.
3. Y. Zhou, S. Sun, S. Xi, Y. Duan, T. Sritharan, Y. Du and Z. J. Xu, *Adv. Mater.*, 2018, **30**, 1705407-1705413.
4. R. J. Toh, A. Y. S. Eng, Z. Sofer, D. Sedmidubsky and M. Pumera, *ChemElectroChem*, 2015, **2**, 982-987.
5. X. Chen, F. Han, X. Chen, C. Zhang and W. Gou, *Catalysts*, 2022, **12**, 1122-1135.
6. S. Kitano, Y. Sato, R. Tagusari, R. Zhu, D. Kowalski, Y. Aoki and H. Habazaki, *RSC Adv.*, 2023, **13**, 10681-10692.
7. T. Yu, H. Xu, Z. Jin, Y. Zhang and H.-J. Qiu, *Appl. Surf. Sci.*, 2023, **610**, 155624-155630.
8. M. S. Matseke, H. Luo, L. Wen and H. Zheng, *J. Phys. Chem. Solids*, 2022, **165**, 110644-110670.
9. W. Deelod, T. Priamushko, J. Čížek, S. Suramitr and F. Kleitz, *ACS Appl. Mater. Interfaces*, 2022, **14**, 23307-23321.
10. W. Hu, Y. Bai, S. Yao, Q. Liu, X. Xu, T. Lv and D. Noréus, *J. Alloys Compd.*, 2023, **936**, 168185-168197.
